# Supplementary material for: Mitochondrial Diabetes in Children: Seek and You Will Find It
Source: PubMed Central journal article supplement (PMC3334935; doi:10.1371/journal.pone.0034956), 2012-04-19
Supplement: pone.0034956.s004.pdf [file pone.0034956.s004.pdf]

**Table S1 Primers sequence for Long PCR of mtDNA**

| <b>Name</b> | <b>Primer sequence 5'-3'/PCR</b> | <b>Nucleotide Position</b> |
|-------------|----------------------------------|----------------------------|
| mt1 forward | CACAGCCACTTTCCACACAG             | 257                        |
| mt1 reverse | TTTGCTCCACAGATTCAGA              | 8175                       |
| mt2 forward | GGCGGACTAATCTTCAACTC             | 7926                       |
| mt2 reverse | TTGTTTATGGGGTGATGTGA             | 630                        |
