# Supplementary material for: Mitochondrial Diabetes in Children: Seek and You Will Find It
Source: PubMed Central journal article supplement (PMC3334935; doi:10.1371/journal.pone.0034956), 2012-04-19
Supplement: pone.0034956.s005.pdf [file pone.0034956.s005.pdf]

**Table S2 Primers sequence for mtDNA sequencing**

| <b>Name</b> | <b>Primer sequence 5'-3'/Sequencing</b> | <b>Nucleotide Position</b> |
|-------------|-----------------------------------------|----------------------------|
| 1           | GCTTCTGGCCACAGCACT                      | 316                        |
| 2           | GCATCAAGCACGCAGCAA                      | 755                        |
| 3           | ACCGCCATCTTCAGCAAACC                    | 1260                       |
| 4           | GCTAAGACCCCCGAAACCAG                    | 1894                       |
| 5           | CGATGGTGCAGCCGCTATTA                    | 3009                       |
| 6           | TTACCGGGCTCTGCCATCTT                    | 3252                       |
| 7           | GCGAGCAGTAGCCCAAACAA                    | 3705                       |
| 8           | CCCATTACAATCTCCAGCAT                    | 4228                       |
| 9           | CCGGACAATGAACCATAACCAA                  | 4711                       |
| 10          | AGAAGCCCCGGCAGGTTT                      | 5759                       |
| 11          | CGCTAACCGGCTTTTTGC                      | 5236                       |
| 12          | ATATGGCGTTTCCCCGCATA                    | 6175                       |
| 13          | TGGCTTCCTAGGGTTTATCGTG                  | 6743                       |
| 14          | CTGAGAACC AAAATGAACGA                   | 8515                       |
| 15          | GGCGGACTAATCTTCAACTC                    | 7926                       |
| 16          | TTTGCTCCACAGATTTCAGA                    | 8175                       |
| 17          | GCGCCACCCTAGCAATATCA                    | 9053                       |
| 18          | CTGAGCTCACCATAGTCT                      | 9641                       |
| 19          | ATCCACCCCTTACGAGTG                      | 10157                      |
| 20          | CCCCACCTTGGCTATCATCA                    | 11140                      |
| 21          | CCAAATGCCCTCATTTACA                     | 10466                      |
| 22          | CCTATCCCTCAACCCCGACA                    | 12097                      |
| 23          | CCCCATCGCTGGGTCAATAG                    | 11428                      |
| 24          | CAGCAGTCTGCGCCCTTACA                    | 13199                      |
| 25          | CCCAAACAACCCAGCTCTCC                    | 12548                      |
| 26          | CTCCCGAATCAACCCTGACC                    | 14263                      |
| 27          | ACCTCCCTGACAAGCGCCTA                    | 13582                      |
| 28          | TGCACGAAACGGGATCAAAC                    | 15345                      |
| 29          | TTCTCGCACGGACTACAACCA                   | 14676                      |
| 30          | GCCGCAGACCTCCTCATTCT                    | 15731                      |
| 31          | GGTCCCTTGACCACCATCCT                    | 16390                      |
| 32          | GCTTCTGGCCACAGCACT                      | 316                        |
