# Supplementary material for: Mitochondrial Diabetes in Children: Seek and You Will Find It
Source: PubMed Central journal article supplement (PMC3334935; doi:10.1371/journal.pone.0034956), 2012-04-19
Supplement: pone.0034956.s006.pdf [file pone.0034956.s006.pdf]

**Table S3 MtDNA variants and their percentage detected in control subjects or both in control subjects and Mitochondrial Diabetic patients**

| mtDNA         |                   |                   |                                       |                        |
|---------------|-------------------|-------------------|---------------------------------------|------------------------|
| Region        | Nucleotide change | Amino acid change | Mitochondrial Diabetic patients n (%) | Control subjects n (%) |
| D-Loop        | 72T>C             |                   | 2 (18.2)                              | 2 (2.5)                |
| D-Loop        | 73A>G             |                   | 2 (18.2)                              | 47 (58.8)              |
| D-Loop        | 93A>G             |                   |                                       | 2 (2.5)                |
| D-Loop        | 114C>T            |                   |                                       | 2 (2.5)                |
| D-Loop        | 143G>A            |                   |                                       | 3 (3.7)                |
| D-Loop        | 146T>C            |                   | 1 (9.1)                               | 8 (10.0)               |
| D-Loop        | 150C>T            |                   |                                       | 11 (13.7)              |
| D-Loop        | 151C>T            |                   |                                       | 3 (3.7)                |
| D-Loop        | 152T>C            |                   | 3 (27.3) <sup>a</sup>                 | 15 (18.8)              |
| D-Loop        | 153A>G            |                   |                                       | 6 (7.5)                |
| D-Loop        | 183A>G            |                   |                                       | 1 (1.2)                |
| D-Loop        | 185G>A            |                   |                                       | 3 (3.7)                |
| D-Loop        | 189A>G            |                   |                                       | 3 (3.7)                |
| D-Loop        | 194C>T            |                   |                                       | 2 (2.5)                |
| D-Loop        | 195T>C            |                   | 1 (9.1)                               | 14 (17.5)              |
| D-Loop        | 198C>T            |                   |                                       | 2 (2.5)                |
| D-Loop        | 199T>C            |                   |                                       | 2 (2.5)                |
| D-Loop        | 200A>G            |                   |                                       | 1 (1.2)                |
| D-Loop        | 204T>C            |                   |                                       | 5 (6.2)                |
| D-Loop        | 207G>A            |                   | 1 (9.1)                               | 3 (3.7)                |
| D-Loop        | 210A>G            |                   |                                       | 1 (1.2)                |
| D-Loop        | 225G>A            |                   |                                       | 4 (5.0)                |
| D-Loop        | 228G>A            |                   |                                       | 4 (5.0)                |
| D-Loop        | 250T>C            |                   |                                       | 2 (2.5)                |
| D-Loop        | 263A>G            |                   | 11 (100)                              | 71 (88.7)              |
| <b>D-Loop</b> | <b>281A&gt;C</b>  |                   |                                       | <b>1 (1.2)</b>         |
| D-Loop        | 294T>C            |                   |                                       | 1 (1.2)                |
| D-Loop        | 295C>T            |                   |                                       | 7 (8.7)                |
| D-Loop        | 310T>C            |                   | 3 (27.3)                              | 36 (45.0)              |
| D-Loop        | 456C>T            |                   |                                       | 2 (2.5)                |
| D-Loop        | 462C>T            |                   |                                       | 5 (6.2)                |
| D-Loop        | 468C>T            |                   |                                       | 1 (1.2)                |
| D-Loop        | 482T>C            |                   |                                       | 3 (3.7)                |
| D-Loop        | 487A>G            |                   |                                       | 1 (1.2)                |
| D-Loop        | 489T>C            |                   |                                       | 9 (11.2)               |
| D-Loop        | 497C>T            |                   | 1 (9.1)                               | 2 (2.5)                |
| D-Loop        | 499G>A            |                   |                                       | 1 (1.2)                |
| D-Loop        | 523 delAC         |                   | 1 (9.1)                               | 5 (6.2)                |
| <b>D-Loop</b> | <b>574A&gt;C</b>  |                   |                                       | <b>2 (2.5)</b>         |
| MT-RNR1       | 709G>A            |                   | 3 (27.3)                              | 10 (12.5)              |
| MTRNR1        | 748G>A            |                   |                                       | 1 (1.2)                |
| MT-RNR1       | 750A>G            |                   | 11 (100)                              | 69 (86.2)              |

|               |                   |            |           |                |
|---------------|-------------------|------------|-----------|----------------|
| MTRNR1        | 930G>A            |            |           | 3 (3.7)        |
| MTRNR1        | 961T>C            |            |           | 2 (2.5)        |
| MTRNR1        | 980T>C            |            |           | 2 (2.5)        |
| MTRNR1        | 1018G>A           |            |           | 1 (1.2)        |
| MT-RNR1       | 1189T>C           |            | 1 (9.1)   | 4 (5.0)        |
| MTRNR1        | 1243T>C           |            |           | 2 (2.5)        |
| MT-RNR1       | 1438A>G           |            | 10 (90.9) | 74 (92.5)      |
| MTRNR1        | 1598G>A           |            |           | 2 (2.5)        |
| MTRNR2        | 1700T>C           |            |           | 3 (3.7)        |
| MTRNR2        | 1719G>A           |            |           | 10 (12.5)      |
| MT-RNR2       | 1811A>G           |            | 1 (9.1)   | 12 (15.0)      |
| MTRNR2        | 1888G>A           |            |           | 5 (6.2)        |
| MTRNR2        | 2259C>T           |            |           | 1 (1.2)        |
| MTRNR2        | 2294A>G           |            |           | 2 (2.5)        |
| MTRNR2        | 2352T>C           |            |           | 1 (1.2)        |
| MTRNR2        | 2416T>C           |            |           | 1 (1.2)        |
| MTRNR2        | 2639C>T           |            |           | 2 (2.5)        |
| MT-RNR2       | 2706A>G           |            | 1 (9.1)   | 41 (51.2)      |
| MTRNR2        | 2789C>T           |            |           | 1 (1.2)        |
| MTRNR2        | 3010G>A           |            |           | 11 (13.7)      |
| MTRNR2        | 3027T>C           |            |           | 2 (2.5)        |
| MT-RNR2       | 3197T>C           |            | 1 (9.1)   | 6 (7.5)        |
| MTRNR2        | 3200T>C           |            |           | 1 (1.2)        |
| MTRNR2        | 3202T>C           |            |           | 1 (1.2)        |
| <b>MTRNR2</b> | <b>3213A&gt;G</b> |            |           | <b>1 (1.2)</b> |
| MT-TL1        | 3290T>C           |            |           | 1 (1.2)        |
| MT-ND1        | 3316G>A           | A-T        |           | 1 (1.2)        |
| MT-ND1        | 3394T>C           | Y-H        |           | 1 (1.2)        |
| MT-ND1        | 3396T>C           | syn        |           | 1 (1.2)        |
| MT-ND1        | 3421G>A           | V-I        |           | 1 (1.2)        |
| <b>MT-ND1</b> | <b>3456T&gt;C</b> | <b>syn</b> |           | <b>1 (1.2)</b> |
| MT-ND1        | 3480A>G           | syn        | 1 (9.1)   | 3 (3.7)        |
| MT-ND1        | 3505A>G           | T-A        |           | 2 (2.5)        |
| MT-ND1        | 3546C>A           | syn        |           | 2 (2.5)        |
| MT-ND1        | 3579A>G           | syn        |           | 13 (16.2)      |
| MT-ND1        | 3594C>T           | syn        |           | 1 (1.2)        |
| MT-ND1        | 3834G>A           | syn        |           | 1 (1.2)        |
| MT-ND1        | 3921C>A           | syn        |           | 2 (2.5)        |
| <b>MT-ND1</b> | <b>3984C&gt;T</b> | <b>syn</b> |           | <b>1 (1.2)</b> |
| MT-ND1        | 3992C>T           | T-M        | 1 (9.1)   | 1 (1.2)        |
| <b>MT-ND1</b> | <b>4002T&gt;C</b> | <b>syn</b> |           | <b>1 (1.2)</b> |
| MT-ND1        | 4011C>T           | syn        |           | 1 (1.2)        |
| MT-ND1        | 4029C>T           | syn        |           | 1 (1.2)        |
| <b>MT-ND1</b> | <b>4050C&gt;T</b> | <b>syn</b> |           | <b>1 (1.2)</b> |
| MT-ND1        | 4093A>G           | T-A        |           | 2 (2.5)        |
| MT-ND1        | 4104A>G           | syn        |           | 1 (1.2)        |
| MT-ND1        | 4188A>G           | syn        |           | 3 (3.7)        |
| MT-ND1        | 4216T>C           | Y-H        |           | 13 (16.2)      |

|               |                   |            |          |                |
|---------------|-------------------|------------|----------|----------------|
| <b>MT-ND1</b> | <b>4221C&gt;A</b> | <b>syn</b> |          | <b>1 (1.2)</b> |
| MT-ND1        | 4232T>C           | I-T        |          | 1 (1.2)        |
| <b>MT-ND1</b> | <b>4243A&gt;G</b> | <b>syn</b> |          | <b>1 (1.2)</b> |
| MT-TQ         | 4336T>C           | T-C        |          | 1 (1.2)        |
| <b>MT-ND2</b> | <b>4512G&gt;A</b> | <b>A-T</b> |          | <b>1 (1.2)</b> |
| MT-ND2        | 4529A>T           | syn        |          | 2 (2.5)        |
| MT-ND2        | 4561T>C           | V-A        |          | 1 (1.2)        |
| MT-ND2        | 4580G>A           | syn        |          | 2 (2.5)        |
| MT-ND2        | 4586T>C           | syn        |          | 1 (1.2)        |
| MT-ND2        | 4639T>C           | I-T        |          | 1 (1.2)        |
| MT-ND2        | 4640C>A           | I-M        |          | 3 (3.7)        |
| MT-ND2        | 4646T>C           | syn        |          | 2 (2.5)        |
| MT-ND2        | 4659G>A           | A-T        |          | 1 (1.2)        |
| <b>MT-ND2</b> | <b>4677C&gt;T</b> | <b>L-F</b> |          | <b>1 (1.2)</b> |
| MT-ND2        | 4688T>C           | syn        |          | 1 (1.2)        |
| MT-ND2        | 4703T>C           | syn        |          | 2 (2.5)        |
| MT-ND2        | 4736T>C           | syn        |          | 1 (1.2)        |
| <b>MT-ND2</b> | <b>4749T&gt;C</b> | <b>S-P</b> |          | <b>1 (1.2)</b> |
| MT-ND2        | 4769A>G           | syn        | 11 (100) | 73 (91.2)      |
| MT-ND2        | 4793A>G           | syn        |          | 1 (1.2)        |
| MT-ND2        | 4907T>C           | syn        |          | 1 (1.2)        |
| MT-ND2        | 4917A>G           | N-D        |          | 6 (7.5)        |
| <b>MT-ND2</b> | <b>4953A&gt;G</b> | <b>I-V</b> |          | <b>1 (1.2)</b> |
| MT-ND2        | 4960C>T           | A-V        |          | 2 (2.5)        |
| MT-ND2        | 5004T>C           | syn        | 1 (9.1)  | 1 (1.3)        |
| MT-ND2        | 5046G>A           | V-I        |          | 2 (2.5)        |
| MT-ND2        | 5054G>A           | syn        |          | 2 (2.5)        |
| <b>MT-ND2</b> | <b>5081T&gt;C</b> | <b>syn</b> |          | <b>1 (1.2)</b> |
| MT-ND2        | 5130T>C           | syn        |          | 1 (1.2)        |
| <b>MT-ND2</b> | <b>5135C&gt;T</b> | <b>syn</b> |          | <b>1 (1.2)</b> |
| MT-ND2        | 5147G>A           | syn        | 1 (9.1)  | 3 (3.7)        |
| MT-ND2        | 5198A>G           | syn        |          | 2 (2.5)        |
| MT-ND2        | 5261G>A           | syn        |          | 1 (1.2)        |
| MT-ND2        | 5319A>G           | T-S        |          | 2 (2.5)        |
| MT-ND2        | 5360C>T           | syn        |          | 1 (1.2)        |
| MT-ND2        | 5460G>A           | A-T        |          | 3 (3.7)        |
| MT-ND2        | 5471G>A           | syn        | 1 (9.1)  | 3 (3.7)        |
| MT-ND2        | 5495T>C           | syn        |          | 1 (1.2)        |
| MT-ND2        | 5498A>G           | syn        |          | 1 (1.2)        |
| <b>MT-TW</b>  | <b>5530C&gt;T</b> |            |          | <b>1 (1.2)</b> |
| MT-TA         | 5633C>T           |            |          | 3 (3.7)        |
| MT-TA         | 5655T>C           |            |          | 1 (1.2)        |
| MT-NC4        | 5656A>G           |            |          | 1 (1.2)        |
| MT-CO1        | 5999T>C           | syn        |          | 1 (1.2)        |
| MT-CO1        | 6026G>A           | syn        |          | 1 (1.2)        |
| MT-CO1        | 6047A>G           | syn        |          | 1 (1.2)        |
| MT-CO1        | 6125A>G           | syn        |          | 1 (1.2)        |
| <b>MT-CO1</b> | <b>6126A&gt;G</b> | <b>I-V</b> |          | <b>1 (1.2)</b> |

|               |                   |            |          |                |
|---------------|-------------------|------------|----------|----------------|
| MT-CO1        | 6173C>T           | syn        |          | 1 (1.2)        |
| MT-CO1        | 6221T>C           | syn        | 1 (9.1)  | 6 (7.5)        |
| MT-CO1        | 6261G>A           | A-T        |          | 1 (1.2)        |
| MT-CO1        | 6266A>G           | syn        |          | 1 (1.2)        |
| <b>MT-CO1</b> | <b>6297T&gt;C</b> | <b>syn</b> |          | <b>1 (1.2)</b> |
| <b>MT-CO1</b> | <b>6314C&gt;A</b> | <b>syn</b> |          | <b>1 (1.2)</b> |
| MT-CO1        | 6359A>G           | syn        |          | 1 (1.2)        |
| MT-CO1        | 6365T>C           | syn        |          | 1 (1.2)        |
| MT-CO1        | 6371C>T           | syn        |          | 5 (6.2)        |
| <b>MT-CO1</b> | <b>6518C&gt;T</b> | <b>syn</b> |          | <b>1 (1.2)</b> |
| MT-CO1        | 6524T>C           | syn        |          | 2 (2.5)        |
| MT-CO1        | 6546C>T           | L-F        |          | 1 (1.2)        |
| MT-CO1        | 6599A>G           | syn        |          | 1 (1.2)        |
| MT-CO1        | 6629A>G           | syn        |          | 2 (2.5)        |
| MT-CO1        | 6663A>G           | syn        |          | 1 (1.2)        |
| MT-CO1        | 6719T>C           | syn        |          | 2 (2.5)        |
| MT-CO1        | 6734G>A           | syn        |          | 3 (3.7)        |
| MT-CO1        | 6776T>C           | syn        | 1 (9.1)  | 2 (2.5)        |
| <b>MT-CO1</b> | <b>6899G&gt;A</b> | <b>syn</b> |          | <b>1 (1.2)</b> |
| <b>MT-CO1</b> | <b>6975T&gt;C</b> | <b>syn</b> |          | <b>1 (1.2)</b> |
| MT-CO1        | 7028C>T           | syn        | 4 (36.4) | 51 (63.7)      |
| MT-CO1        | 7055A>G           | syn        |          | 2 (2.5)        |
| MT-CO1        | 7076A>G           | syn        |          | 1 (1.2)        |
| MT-CO1        | 7094T>C           | syn        |          | 2 (2.5)        |
| MT-CO1        | 7175T>C           | syn        |          | 1 (1.2)        |
| MT-CO1        | 7184A>G           | syn        |          | 1 (1.2)        |
| MT-CO1        | 7226G>A           | syn        |          | 1 (1.2)        |
| MT-CO1        | 7247C>T           | syn        |          | 1 (1.2)        |
| MT-CO1        | 7256C>T           | syn        |          | 1 (1.2)        |
| MT-CO1        | 7274C>T           | syn        |          | 1 (1.2)        |
| MT-CO1        | 7299A>G           | M-V        |          | 1 (1.2)        |
| MT-TS1        | 7476C>T           |            |          | 2 (2.5)        |
| MT-TD         | 7521G>A           |            |          | 1 (1.2)        |
| MT-TD         | 7547T>C           |            |          | 1 (1.2)        |
| <b>MT-TD</b>  | <b>7572T&gt;C</b> |            |          | <b>1 (1.2)</b> |
| MT-CO2        | 7598G>A           | A-T        |          | 1 (1.2)        |
| MT-CO2        | 7621T>C           | syn        |          | 1 (1.2)        |
| MT-CO2        | 7645T>C           | syn        |          | 2 (2.5)        |
| <b>MT-CO2</b> | <b>7746A&gt;G</b> | <b>N-S</b> |          | <b>1 (1.2)</b> |
| MT-CO2        | 7768A>G           | syn        |          | 1 (1.2)        |
| MT-CO2        | 7771A>G           | syn        |          | 1 (1.2)        |
| MT-CO2        | 7789G>A           | syn        |          | 1 (1.2)        |
| MT-CO2        | 7844A>G           | T-A        |          | 1 (1.2)        |
| MT-CO2        | 7858C>T           | syn        |          | 1 (1.2)        |
| MT-CO2        | 7961T>C           | syn        |          | 1 (1.2)        |
| MT-CO2        | 7963A>G           | syn        |          | 1 (1.2)        |
| MT-CO2        | 8137C>T           | syn        |          | 1 (1.2)        |
| MT-CO2        | 8152G>A           | syn        |          | 3 (3.7)        |

|                |                   |            |           |                |
|----------------|-------------------|------------|-----------|----------------|
| MT-CO2         | 8206G>A           | syn        |           | 1 (1.2)        |
| MT-CO2         | 8222T>C           | syn        |           | 1 (1.2)        |
| MT-CO2         | 8251G>A           | syn        |           | 7 (8.7)        |
| MT-ATP8        | 8389A>G           | syn        |           | 1 (1.2)        |
| MT-ATP8        | 8393C>T           | P-S        |           | 1 (1.2)        |
| MT-ATP8        | 8448T>C           | M-T        |           | 1 (1.2)        |
| MT-ATP8        | 8460A>G           | N-S        |           | 1 (1.2)        |
| MT-ATP8        | 8472C>T           | P-L        |           | 2 (2.5)        |
| <b>MT-ATP8</b> | <b>8555T&gt;C</b> | <b>syn</b> |           | <b>1 (1.2)</b> |
| MT-ATP6        | 8572G>A           | G-S        |           | 1 (1.2)        |
| MT-ATP8        | 8572G>A           | Ter-Ter    |           | 1 (1.2)        |
| <b>MT-ATP6</b> | <b>8596A&gt;G</b> | <b>I-V</b> |           | <b>1 (1.2)</b> |
| MT-ATP6        | 8614T>C           | syn        |           | 1 (1.2)        |
| <b>MT-ATP6</b> | <b>8633A&gt;G</b> | <b>Y-L</b> |           | <b>1 (1.2)</b> |
| MT-ATP6        | 8684C>T           | T-I        |           | 1 (1.2)        |
| MT-ATP6        | 8697G>A           | syn        |           | 6 (7.5)        |
| MT-ATP6        | 8701A>G           | T-A        |           | 2 (2.5)        |
| MT-ATP6        | 8705T>C           | M-T        |           | 1 (1.2)        |
| <b>MT-ATP6</b> | <b>8806C&gt;T</b> | <b>P-S</b> |           | <b>1 (1.2)</b> |
| MT-ATP6        | 8818C>T           | syn        |           | 1 (1.2)        |
| MT-ATP6        | 8836A>G           | M-V        |           | 2 (2.5)        |
| MT-ATP6        | 8860A>G           | T-A        | 10 (90.9) | 69 (86.2)      |
| MT-ATP6        | 8865G>A           | syn        |           | 1 (1.2)        |
| MT-ATP6        | 8869A>G           | M-V        |           | 1 (1.2)        |
| MT-ATP6        | 8938A>G           | I-V        |           | 1 (1.2)        |
| MT-ATP6        | 8994G>A           | syn        |           | 1 (1.2)        |
| MT-ATP6        | 9033A>G           | syn        |           | 1 (1.2)        |
| MT-ATP6        | 9090T>C           | syn        |           | 4 (5.0)        |
| MT-ATP6        | 9111T>C           | syn        |           | 1 (1.2)        |
| MT-ATP6        | 9123G>A           | syn        |           | 1 (1.2)        |
| <b>MT-ATP6</b> | <b>9139G&gt;A</b> | <b>A-T</b> |           | <b>1 (1.2)</b> |
| <b>MT-CO3</b>  | <b>9221A&gt;G</b> | <b>syn</b> |           | <b>1 (1.2)</b> |
| <b>MT-CO3</b>  | <b>9266G&gt;A</b> | <b>syn</b> |           | <b>1 (1.2)</b> |
| <b>MT-CO3</b>  | <b>9318C&gt;T</b> | <b>H-Y</b> |           | <b>1 (1.2)</b> |
| MT-CO3         | 9335C>T           | syn        |           | 2 (2.5)        |
| MT-CO3         | 9452G>A           | syn        |           | 1 (1.2)        |
| MT-CO3         | 9477G>A           | V-I        | 1 (9.1)   | 6 (7.5)        |
| MT-CO3         | 9540T>C           | syn        |           | 2 (2.5)        |
| <b>MT-CO3</b>  | <b>9656T&gt;C</b> | <b>syn</b> |           | <b>4 (5.0)</b> |
| MT-CO3         | 9698T>C           | syn        | 1 (9.1)   | 4 (5.0)        |
| MT-CO3         | 9716T>C           | syn        |           | 1 (1.2)        |
| <b>MT-CO3</b>  | <b>9742C&gt;T</b> | <b>S-L</b> |           | <b>1 (1.2)</b> |
| MT-CO3         | 9756T>G           | S-A        |           | 1 (1.2)        |
| MT-CO3         | 9758T>C           | syn        |           | 1 (1.2)        |
| MT-CO3         | 9899T>C           | syn        |           | 1 (1.2)        |
| <b>MT-CO3</b>  | <b>9903T&gt;C</b> | <b>F-L</b> |           | <b>1 (1.2)</b> |
| MT-CO3         | 9932G>A           | syn        |           | 2 (2.5)        |
| MT-CO3         | 9948G>A           | V-I        |           | 2 (2.5)        |

|                |                    |            |          |                |
|----------------|--------------------|------------|----------|----------------|
| MT-CO3         | 9966G>A            | V-I        |          | 2 (2.5)        |
| MT-TG          | 10031T>C           |            |          | 1 (1.2)        |
| MT-TG          | 10034T>C           |            |          | 2 (2.5)        |
| MT-ND3         | 10115T>C           | syn        |          | 1 (1.2)        |
| MT-ND3         | 10142C>T           | syn        |          | 1 (1.2)        |
| MT-ND3         | 10143G>A           | G-S        |          | 1 (1.2)        |
| MT-ND3         | 10166T>C           | syn        |          | 1 (1.2)        |
| MT-ND3         | 10172G>A           | syn        |          | 1 (1.2)        |
| MT-ND3         | 10191T>C           | S-P        |          | 1 (1.2)        |
| MT-ND3         | 10217A>G           | syn        |          | 3 (3.7)        |
| MT-ND3         | 10237T>C           | I-T        |          | 1 (1.2)        |
| MT-ND3         | 10238T>C           | syn        |          | 1 (1.2)        |
| MT-ND3         | 10283A>G           | syn        |          | 6 (7.5)        |
| <b>MT-ND3</b>  | <b>10322T&gt;C</b> | <b>syn</b> |          | <b>1 (1.2)</b> |
| <b>MT-ND3</b>  | <b>10334C&gt;T</b> | <b>syn</b> |          | <b>1 (1.2)</b> |
| <b>MT-ND3</b>  | <b>10356C&gt;T</b> | <b>syn</b> |          | <b>1 (1.2)</b> |
| MT-ND3         | 10398A>G           | T-A        | 1 (9.1)  | 13 (16.2)      |
| MT-ND3         | 10400C>T           | syn        |          | 1 (1.2)        |
| MT-TR          | 10463T>C           |            |          | 7 (8.7)        |
| MT-ND4L        | 10506A>G           | T-A        |          | 2 (2.5)        |
| MT-ND4L        | 10550A>G           | syn        | 1 (9.1)  | 3 (3.7)        |
| MT-ND4L        | 10586G>A           | syn        |          | 1 (1.2)        |
| <b>MT-ND4L</b> | <b>10739A&gt;G</b> | <b>syn</b> |          | <b>1 (1.2)</b> |
| MT-ND4         | 10810T>C           | syn        |          | 2 (2.5)        |
| MT-ND4         | 10873T>C           | syn        |          | 2 (2.5)        |
| MT-ND4         | 10978A>G           | syn        |          | 1 (1.2)        |
| MT-ND4         | 11016G>A           | S-N        |          | 1 (1.2)        |
| MT-ND4         | 11025T>C           | C-P        |          | 1 (1.2)        |
| MT-ND4         | 11061C>T           | S-F        |          | 1 (1.2)        |
| MT-ND4         | 11242C>G           | syn        |          | 1 (1.2)        |
| MT-ND4         | 11251A>G           | syn        |          | 13 (16.2)      |
| MT-ND4         | 11299T>C           | syn        | 1 (9.1)  | 4 (5.0)        |
| MT-ND4         | 11332C>T           | syn        |          | 1 (1.2)        |
| MT-ND4         | 11362A>G           | syn        |          | 2 (2.5)        |
| MT-ND4         | 11437T>C           | syn        |          | 1 (1.2)        |
| MT-ND4         | 11440G>A           | syn        |          | 1 (1.2)        |
| MT-ND4         | 11467A>G           | syn        | 2 (18.2) | 18 (22.5)      |
| MT-ND4         | 11653A>G           | syn        |          | 1 (1.2)        |
| MT-ND4         | 11674C>T           | syn        |          | 2 (2.5)        |
| MT-ND4         | 11719G>A           | syn        | 2 (18.2) | 45 (56.2)      |
| MT-ND4         | 11812A>G           | syn        |          | 5 (6.2)        |
| <b>MT-ND4</b>  | <b>11827T&gt;C</b> | <b>syn</b> |          | <b>1 (1.2)</b> |
| MT-ND4         | 11914G>A           | syn        |          | 3 (3.7)        |
| MT-ND4         | 11944T>C           | syn        |          | 1 (1.2)        |
| MT-ND4         | 11947A>G           | syn        |          | 2 (2.5)        |
| MT-ND4         | 11971C>T           | syn        |          | 1 (1.2)        |
| MT-TS2         | 12234A>G           |            |          | 1 (1.2)        |
| <b>MT-TL2</b>  | <b>12246C&gt;T</b> |            |          | <b>1 (1.2)</b> |

|               |                    |            |          |                |
|---------------|--------------------|------------|----------|----------------|
| MT-ND5        | 12346C>T           | H-Y        |          | 2 (2.5)        |
| MT-TL2        | 12308A>G           |            | 2 (18.2) | 18 (22.5)      |
| MT-ND5        | 12372G>A           | syn        | 2 (18.2) | 18 (22.5)      |
| <b>MT-ND5</b> | <b>12378C&gt;T</b> | <b>syn</b> |          | <b>1 (1.2)</b> |
| MT-ND5        | 12414T>C           | syn        |          | 2 (2.5)        |
| MT-ND5        | 12501G>A           | syn        |          | 5 (6.2)        |
| MT-ND5        | 12612A>G           | syn        |          | 6 (7.5)        |
| MT-ND5        | 12633C>T           | syn        |          | 2 (2.5)        |
| MT-ND5        | 12693A>G           | syn        |          | 1 (1.2)        |
| MT-ND5        | 12705C>T           | syn        |          | 14 (17.5)      |
| MT-ND5        | 12771G>A           | syn        |          | 1 (1.2)        |
| MT-ND5        | 12930A>G           | syn        |          | 1 (1.2)        |
| MT-ND5        | 12937A>G           | M-V        |          | 1 (1.2)        |
| MT-ND5        | 13368G>A           | syn        |          | 6 (7.5)        |
| MT-ND5        | 13617T>C           | syn        | 1 (9.1)  | 8 (10.0)       |
| MT-ND5        | 13708G>A           | A-T        |          | 8 (10.0)       |
| MT-ND5        | 13743T>C           | syn        |          | 4 (5.0)        |
| MT-ND5        | 13759G>A           | A-T        |          | 2 (2.5)        |
| MT-ND5        | 13780A>G           | I-V        |          | 2 (2.5)        |
| MT-ND5        | 13934C>T           | T-M        |          | 3 (3.7)        |
| MT-ND5        | 13966A>G           | T-A        |          | 5 (6.2)        |
| MT-ND5        | 14139A>G           | syn        |          | 6 (7.5)        |
| MT-ND6        | 14167C>T           | syn        | 1 (9.1)  | 5 (6.2)        |
| MT-ND6        | 14233A>G           | syn        |          | 5 (6.2)        |
| MT-ND6        | 14470T>C           | syn        |          | 5 (6.2)        |
| MT-ND6        | 14569G>A           | syn        | 3 (27.3) | 1 (1.2)        |
| MT-CYB        | 14766C>T           | T-I        | 2 (18.2) | 45 (56.2)      |
| MT-CYB        | 14769A>G           | N-S        |          | 1 (1.2)        |
| MT-CYB        | 14783T>C           | syn        |          | 1 (1.2)        |
| MT-CYB        | 14793A>G           | H-R        | 1 (9.1)  | 5 (6.2)        |
| MT-CYB        | 14798T>C           | F-L        | 1 (9.1)  | 8 (10.0)       |
| MT-CYB        | 14905G>A           | syn        |          | 6 (7.5)        |
| MT-CYB        | 15043G>A           | syn        |          | 3 (3.7)        |
| MT-CYB        | 15071T>C           | Y-N        |          | 1 (1.2)        |
| MT-CYB        | 15110G>A           | A-T        | 1 (9.1)  | 1 (1.2)        |
| MT-CYB        | 15218A>G           | T-A        |          | 5 (6.2)        |
| MT-CYB        | 15301G>A           | syn        |          | 2 (2.5)        |
| MT-CYB        | 15326A>G           | T-A        | 11 (100) | 71 (88.7)      |
| MT-CYB        | 15452C>A           | L-I        |          | 13 (16.2)      |
| MT-CYB        | 15454T>C           | syn        |          | 4 (5.0)        |
| MT-CYB        | 15607A>G           | syn        |          | 6 (7.5)        |
| MT-TT         | 15904C>T           |            |          | 2 (2.5)        |
| MT-TT         | 15910C>T           |            |          | 1 (1.2)        |
| MT-TT         | 15924A>G           |            |          | 5 (6.2)        |
| MT-TT         | 15928G>A           |            |          | 6 (7.5)        |
| D-Loop        | 16069C>T           |            |          | 7 (8.7)        |
| D-Loop        | 16074A>G           |            |          | 1 (1.2)        |
| D-Loop        | 16086T>C           |            |          | 1 (1.2)        |

|               |                    |                      |                |
|---------------|--------------------|----------------------|----------------|
| D-Loop        | 16093T>C           |                      | 4 (5.0)        |
| D-Loop        | 16126T>C           |                      | 15 (18.7)      |
| D-Loop        | 16129G>A           | 1 (9.1)              | 3 (3.8)        |
| D-Loop        | 16134C>T           |                      | 1 (1.2)        |
| D-Loop        | 16140T>C           |                      | 2 (2.5)        |
| D-Loop        | 16142C>T           |                      | 1 (1.2)        |
| D-Loop        | 16145G>A           |                      | 2 (2.5)        |
| D-Loop        | 16148C>T           |                      | 1 (1.2)        |
| D-Loop        | 16150C>T           |                      | 1 (1.2)        |
| D-Loop        | 16153G>A           |                      | 1 (1.2)        |
| D-Loop        | 16154T>C           |                      | 1 (1.2)        |
| D-Loop        | 16162A>G           |                      | 1 (1.2)        |
| D-Loop        | 16163A>G           |                      | 1 (1.2)        |
| D-Loop        | 16172T>C           |                      | 1 (1.2)        |
| D-Loop        | 16176C>G           |                      | 2 (2.5)        |
| D-Loop        | 16180A>G           |                      | 1 (1.2)        |
| D-Loop        | 16182A>C           |                      | 1 (1.2)        |
| D-Loop        | 16183A>C           |                      | 4 (5.0)        |
| D-Loop        | 16184C>T           |                      | 1 (1.2)        |
| D-Loop        | 16185C>T           |                      | 1 (1.2)        |
| D-Loop        | 16186C>T           |                      | 1 (1.2)        |
| D-Loop        | 16188C>T           | 3 (27.3)             | 1 (1.2)        |
| D-Loop        | 16189T>C           | 1 (9.1)              | 12 (15.0)      |
| D-Loop        | 16192C>T           | 1 (9.1)              | 7 (8.8)        |
| D-Loop        | 16193C>T           |                      | 4 (5.0)        |
| D-Loop        | 16224T>C           | 1 (9.1)              | 5 (6.2)        |
| D-Loop        | 16233A>G           | 1 (9.1)              | 13 (16.2)      |
| D-Loop        | 16256C>T           | 1 (9.1)              | 9 (11.2)       |
| D-Loop        | 16260C>T           |                      | 2 (2.5)        |
| D-Loop        | 16270C>T           | 1 (9.1)              | 9 (11.2)       |
| D-Loop        | 16278C>T           | 1 (9.1) <sup>a</sup> | 6 (7.5)        |
| <b>D-Loop</b> | <b>16285A&gt;C</b> |                      | <b>1 (1.2)</b> |
| D-Loop        | 16286C>A           |                      | 1 (1.2)        |
| D-Loop        | 16288T>C           |                      | 3 (3.7)        |
| D-Loop        | 16289A>G           |                      | 5 (6.2)        |
| D-Loop        | 16290C>A           |                      | 1 (1.2)        |
| D-Loop        | 16292C>T           |                      | 3 (3.7)        |
| D-Loop        | 16293A>C           |                      | 9 (11.2)       |
| D-Loop        | 16294C>T           |                      | 7 (8.7)        |
| D-Loop        | 16296C>T           |                      | 4 (5.0)        |
| D-Loop        | 16298T>C           | 2 (18.2)             | 3 (3.7)        |
| D-Loop        | 16304T>C           |                      | 7 (8.7)        |
| D-Loop        | 16311T>C           | 3 (27.3)             | 13 (16.2)      |
| D-Loop        | 16325T>C           |                      | 3 (3.7)        |
| D-Loop        | 16328C>A           |                      | 4 (5.0)        |
| D-Loop        | 16352T>C           |                      | 4 (5.0)        |
| D-Loop        | 16355C>T           |                      | 2 (2.5)        |
| D-Loop        | 16362T>C           | 1 (9.1)              | 4 (5.0)        |



|               |                    |          |                |
|---------------|--------------------|----------|----------------|
| D-Loop        | 16384G>A           |          | 6 (7.5)        |
| D-Loop        | 16390G>A           |          | 6 (7.5)        |
| D-Loop        | 16391G>A           |          | 2 (2.5)        |
| <b>D-Loop</b> | <b>16402A&gt;C</b> |          | <b>2 (2.5)</b> |
| D-Loop        | 16519T>C           | 7 (63.6) | 29 (36.2)      |
| D-Loop        | 16527C>T           |          | 1 (1.2)        |

In bold are reported novel variants; <sup>a</sup>Variant present at heteroplasmic level.

For previously described variants see [www.mitomap.org](http://www.mitomap.org).

The variants detected in Mitochondrial diabetic affected patients were always present also in their mothers.
