# Supplementary material for: Mitochondrial Diabetes in Children: Seek and You Will Find It
Source: PLOS journal article supplement (doi:10.1371/journal.pone.0034956), 2012-04-19
Supplement: S3 (10.1371/journal.pone.0034956.s003) [file journal.pone.0034956.s003]

## **Methods S2. Primers and Real-time quantitative PCR conditions**

We used two set of primers, one specific for the 3243A>G mutation (5'-ATTAAAGTCCTACGTGATC-3' at 3048nt–3066nt and 5'-ATGCGATTACCGGGCC-3' at 3258nt–3243nt) and the other to amplify the entire mtDNA (5'-GCCTTCCCCCGTAAATGATAT-3' at 3163nt–3183nt and 5' GAAGAGGAATTGAACCTCTGACTG-3' at 3298nt–3275nt). The nucleotide sequence of the TaqMan probe was TGCCATCTTAACAAACCCTGTTCTTGGGTT (3241nt–3213nt). PCR was performed for 40 cycles at 95°C for 15 s, at 51°C for 10 s and at 57°C for 1 min.
